# Supplementary material for: Water Consumption by Livestock Systems from 2002–2020 and Predictions for 2030–2050 under Climate Changes in the Czech Republic
Source: MDPI journal article supplement (doi:10.3390/agriculture13071291), 2023-06-24
Supplement: s1 [file s1]

# Water Consumption by Livestock Systems from 2002–2020 and Predictions for 2030–2050 under Climate Changes in the Czech Republic

Vera Potopová <sup>1,\*</sup>, Marie Musiolková <sup>1</sup>, Juliana Arbelaez Gaviria <sup>2</sup>, Miroslav Trnka <sup>2</sup>, Petr Havlík <sup>3</sup>, Esther Boere <sup>3</sup>, Tudor Trifan <sup>1</sup>, Nina Muntean <sup>1</sup> and Md Rafique Ahasan Chawdhery <sup>1</sup>

<sup>1</sup> Department of Agroecology and Crop Production (Meteorological Section), Czech University of Life Sciences Prague, 165 00 Praha-Suchbát, Czech Republic

<sup>2</sup> Global Change Research Institute of the Czech Academy of Sciences, 603 00 Brno, Czech Republic

<sup>3</sup> International Institute for Applied Systems Analysis (IIASA), 2361 Laxenburg, Austria

\* Correspondence: potop@af.czu.cz

## SUPPORTING INFORMATION: Additional supporting information

**Table S1.** Results of GLOBIOM models for crop/livestock products produced in cultivated areas and rainfed cultivated areas. Average values for the years 2020 and 2050 are presented for mutual comparison, and results of linear models of development of values from 2000 to 2050 are chosen as the minimum and maximum values from all GLOBIOM models for regression coefficient (a) and coefficient of determination (R<sup>2</sup>).

| Area cultivated                  | Unit    | Values for individual years |        | Regression characteristics |         |                      |                      |
|----------------------------------|---------|-----------------------------|--------|----------------------------|---------|----------------------|----------------------|
|                                  |         | 2020                        | 2050   | a (min)                    | a (max) | R <sup>2</sup> (min) | R <sup>2</sup> (max) |
| Milk (all)                       | 1000 ha | 354.43                      | 370.34 | -2.41                      | -0.42   | 0.0612               | 0.5823               |
| Barley                           | 1000 ha | 399.76                      | 225.48 | -6.88                      | -3.79   | 0.9261               | 0.9902               |
| Bovine meat                      | 1000 ha | 184.79                      | 227.42 | -0.88                      | 0.77    | 0.0000               | 0.3250               |
| Corn                             | 1000 ha | 45.82                       | 17.30  | -1.07                      | -0.80   | 0.6590               | 0.7779               |
| Corn Silage                      | 1000 ha | 116.43                      | 107.77 | -1.71                      | -0.39   | 0.3015               | 0.9073               |
| Oats                             | 1000 ha | 60.56                       | 77.15  | 0.44                       | 0.52    | 0.9562               | 0.9652               |
| Rye                              | 1000 ha | 23.95                       | 42.76  | 0.54                       |         | 0.9857               |                      |
| Sheep and goat meat              | 1000 ha | 5.84                        | 5.55   | -0.03                      | -0.01   | 0.0973               | 0.8900               |
| Wheat                            | 1000 ha | 768.33                      | 520.62 | -7.26                      | -3.96   | 0.7932               | 0.9759               |
| <b>Area cultivated – rainfed</b> |         |                             |        |                            |         |                      |                      |
| Barley                           | 1000 ha | 399.76                      | 225.48 | -6.88                      | -3.79   | 0.9261               | 0.9902               |
| Corn                             | 1000 ha | 45.82                       | 17.30  | -1.07                      | -0.80   | 0.6590               | 0.7779               |
| Corn Silage                      | 1000 ha | 116.43                      | 107.77 | -1.71                      | -0.39   | 0.3015               | 0.9073               |
| Oats                             | 1000 ha | 60.56                       | 77.15  | 0.44                       | 0.52    | 0.9562               | 0.9652               |
| Rye                              | 1000 ha | 23.95                       | 42.76  | 0.54                       |         | 0.9857               |                      |
| Wheat                            | 1000 ha | 768.33                      | 520.62 | -7.26                      | -3.96   | 0.7932               | 0.9759               |

**Table S2.** Results of GLOBIOM models for land cover types. Average values for the years 2020 and 2050 are presented for mutual comparison, and results of linear models of development of values from 2000 to 2050 are chosen as the minimum and maximum values from all GLOBIOM models for regression coefficient (a) and coefficient of determination ( $R^2$ ).

| Land Cover         | Unit    | Values for individual years |         | Regression characteristics |         |             |             |
|--------------------|---------|-----------------------------|---------|----------------------------|---------|-------------|-------------|
|                    |         | 2020                        | 2050    | a (min)                    | a (max) | $R^2$ (min) | $R^2$ (max) |
| Cropland           | 1000 ha | 2469.20                     | 1651.84 | -29.94                     | -15.89  | 0.9129      | 0.9847      |
| Grassland          | 1000 ha | 545.06                      | 603.32  | -3.33                      | 0.19    | 0.0001      | 0.5018      |
| Other Natural Land | 1000 ha | 1483.86                     | 2135.05 | 16.16                      | 27.34   | 0.9500      | 0.9690      |

**Table S3.** Results of GLOBIOM models for crop yields and rainfed crop yields. Average values for the years 2020 and 2050 are presented for mutual comparison, and results of linear models of development of values from 2000 to 2050 are chosen as the minimum and maximum values from all GLOBIOM models for regression coefficient (a) and coefficient of determination ( $R^2$ ).

| Crop yield                  | Unit    | Values for individual years |       | Regression characteristics |         |             |             |
|-----------------------------|---------|-----------------------------|-------|----------------------------|---------|-------------|-------------|
|                             |         | 2020                        | 2050  | a (min)                    | a (max) | $R^2$ (min) | $R^2$ (max) |
| Milk (all)                  | fm t/ha | 6.22                        | 4.42  | -0.05                      | -0.03   | 0.3843      | 0.7855      |
| Barley                      | fm t/ha | 5.69                        | 5.97  | 0.03                       | 0.05    | 0.6088      | 0.8616      |
| Bovine meat                 | fm t/ha | 0.54                        | 0.44  | 0.00                       | 0.00    | 0.1634      | 0.8587      |
| Corn                        | fm t/ha | 6.88                        | 11.33 | 0.07                       | 0.16    | 0.6590      | 0.8606      |
| Corn Silage                 | fm t/ha | 32.97                       | 31.62 | -0.06                      | -0.02   | 0.9447      | 0.9858      |
| Oats                        | fm t/ha | 3.60                        | 4.05  | 0.02                       |         | 0.9657      |             |
| Rye                         | fm t/ha | 4.55                        | 5.36  | 0.02                       |         | 0.9503      |             |
| Sheep and goat meat         | fm t/ha | 0.47                        | 0.50  | 0.00                       | 0.00    | 0.0001      | 0.9310      |
| Wheat                       | fm t/ha | 6.43                        | 6.39  | 0.02                       | 0.03    | 0.3372      | 0.7642      |
| <b>Crop yield – rainfed</b> |         |                             |       |                            |         |             |             |
| Barley                      | fm t/ha | 5.69                        | 5.97  | 0.03                       | 0.05    | 0.6088      | 0.8616      |
| Corn                        | fm t/ha | 6.88                        | 11.33 | 0.07                       | 0.16    | 0.6590      | 0.8606      |
| Corn Silage                 | fm t/ha | 32.97                       | 31.62 | -0.06                      | -0.02   | 0.9447      | 0.9858      |
| Oats                        | fm t/ha | 3.60                        | 4.05  | 0.02                       |         | 0.9657      | 0.9669      |
| Rye                         | fm t/ha | 4.55                        | 5.36  | 0.02                       |         | 0.9503      |             |
| Wheat                       | fm t/ha | 6.43                        | 6.39  | 0.02                       | 0.03    | 0.3372      | 0.7642      |

**Table S4.** Results of GLOBIOM models for crops used as feed for livestock. Average values for the years 2020 and 2050 are presented for mutual comparison, and results of linear models of development of values from 2000 to 2050 are chosen as the minimum and maximum values from all GLOBIOM models for regression coefficient (a) and coefficient of determination ( $R^2$ ).

| Feed use     | Unit   | Values for individual years |         | Regression characteristics |         |             |             |
|--------------|--------|-----------------------------|---------|----------------------------|---------|-------------|-------------|
|              |        | 2020                        | 2050    | a (min)                    | a (max) | $R^2$ (min) | $R^2$ (max) |
| Barley       | 1000 t | 865.11                      | 516.73  | -14.51                     | -14.14  | 0.9767      | 0.9817      |
| Corn         | 1000 t | 486.59                      | 310.35  | -1.78                      | -1.44   | 0.0746      | 0.1047      |
| Corn Silage  | 1000 t | 3841.07                     | 3423.85 | -61.39                     | -16.28  | 0.4113      | 0.9263      |
| Oats         | 1000 t | 9.49                        | 0.00    | -2.29                      |         | 0.7354      | 0.7358      |
| Rape (RapC)  | 1000 t | 250.09                      | 101.47  | -4.02                      | -3.71   | 0.4974      | 0.5230      |
| Rapeseed Oil | 1000 t | 12.87                       | 8.68    | -0.17                      | -0.17   | 0.9806      | 0.9823      |
| Rye          | 1000 t | 3.89                        | 0.00    | -0.94                      | -0.94   | 0.7354      | 0.7358      |
| Wheat        | 1000 t | 1515.12                     | 894.98  | -25.25                     | -24.60  | 0.9769      | 0.9821      |

**Table S5.** Results of GLOBIOM models for ruminant meat and ruminant milk for different production systems. Average values for the years 2020 and 2050 are presented for mutual comparison, and results of linear models of development of values from 2000 to 2050 are chosen as the minimum and maximum values from all GLOBIOM models for regression coefficient (a) and coefficient of determination (R<sup>2</sup>).

| Ruminant meat                        | Unit   | Values for individual years |        | Regression characteristics |         |                      |                      |
|--------------------------------------|--------|-----------------------------|--------|----------------------------|---------|----------------------|----------------------|
|                                      |        | 2020                        | 2050   | a (min)                    | a (max) | R <sup>2</sup> (min) | R <sup>2</sup> (max) |
| LGT Livestock only systems Temperate | 1000 t | 4.21                        | 23.93  | 0.38                       | 0.59    | 0.8517               | 0.9548               |
| MRT Mixed rainfed Temperate          | 1000 t | 39.76                       | 21.59  | -0.98                      | -0.76   | 0.8586               | 0.9648               |
| Other areas                          | 1000 t | 20.90                       | 22.37  | 0.05                       | 0.05    | 0.9933               | 0.9965               |
| Urban areas                          | 1000 t | 6.90                        | 7.39   | 0.02                       | 0.02    | 0.9943               | 0.9971               |
| <b>Ruminant milk</b>                 |        |                             |        |                            |         |                      |                      |
| LGT Livestock only systems Temperate | 1000 t | 0.04                        | 0.02   | 0.00                       | 0.00    | 0.9124               | 0.9450               |
| MRT Mixed rainfed Temperate          | 1000 t | 1109.61                     | 583.14 | -26.24                     | -20.48  | 0.8655               | 0.9719               |
| Other areas                          | 1000 t | 637.59                      | 653.93 | 0.47                       | 0.47    | 0.9819               | 0.9887               |
| Urban areas                          | 1000 t | 215.86                      | 221.40 | 0.16                       | 0.16    | 0.9814               | 0.9885               |

**Table S6.** Results of GLOBIOM models for ruminant meat and ruminant milk for different production systems. Average values for the years 2020 and 2050 are presented for mutual comparison, and results of linear models of development of values from 2000 to 2050 are chosen as the minimum and maximum values from all GLOBIOM models for regression coefficient (a) and coefficient of determination (R<sup>2</sup>).

| Biofuel | Unit   | Values for individual years |       | Regression characteristics |         |                      |                      |
|---------|--------|-----------------------------|-------|----------------------------|---------|----------------------|----------------------|
|         |        | 2020                        | 2050  | a (min)                    | a (max) | R <sup>2</sup> (min) | R <sup>2</sup> (max) |
| Rape    | 1000 t | 102.0                       | 255.4 | 3.52                       |         | 0.7090               |                      |
| Oil     |        |                             |       |                            |         |                      |                      |
| Wheat   | 1000 t | 13.9                        | 595.1 | 13.14                      |         | 0.7681               |                      |

**Table S7.** Results of GLOBIOM models for emissions from the crop/livestock production. Average values for the years 2020 and 2050 are presented for mutual comparison, and results of linear models of development of values from 2000 to 2050 are chosen as the minimum and maximum values from all GLOBIOM models for regression coefficient (a) and coefficient of determination (R<sup>2</sup>).

| Emissions           | Unit                     | Values for individual years |      | Regression characteristics |         |                      |                      |
|---------------------|--------------------------|-----------------------------|------|----------------------------|---------|----------------------|----------------------|
|                     |                          | 2020                        | 2050 | a (min)                    | a (max) | R <sup>2</sup> (min) | R <sup>2</sup> (max) |
| Milk (all)          | Mt CO <sub>2</sub> eq/yr | 1.49                        | 1.18 | -0.02                      | -0.01   | 0.8814               | 0.9809               |
| Barley              | Mt CO <sub>2</sub> eq/yr | 0.43                        | 0.20 | 0.00                       | 0.00    | 0.1287               | 0.6896               |
| Bovine meat         | Mt CO <sub>2</sub> eq/yr | 0.83                        | 1.00 | 0.00                       | 0.00    | 0.0078               | 0.1247               |
| Corn*               | Mt CO <sub>2</sub> eq/yr | 0.04                        | 0.02 | 0.00                       | 0.00    | 0.1423               | 0.5598               |
| Crop                | Mt CO <sub>2</sub> eq/yr | 2.63                        | 1.66 | -0.02                      | 0.00    | 0.0091               | 0.6098               |
| Corn Silage         | Mt CO <sub>2</sub> eq/yr | 0.10                        | 0.09 | 0.00                       | 0.00    | 0.4420               | 0.8493               |
| Livestock           | Mt CO <sub>2</sub> eq/yr | 2.76                        | 2.45 | -0.02                      | -0.02   | 0.7692               | 0.9012               |
| Oats                | Mt CO <sub>2</sub> eq/yr | 0.03                        | 0.04 | 0.00                       | 0.00    | 0.9326               | 0.9644               |
| Pig meat            | Mt CO <sub>2</sub> eq/yr | 0.36                        | 0.22 | -0.01                      | -0.01   | 0.9862               | 0.9862               |
| Poultry eggs        | Mt CO <sub>2</sub> eq/yr | 0.02                        | 0.02 | 0.00                       | 0.00    | 0.8893               | 0.9213               |
| Poultry meat        | Mt CO <sub>2</sub> eq/yr | 0.04                        | 0.02 | 0.00                       | 0.00    | 0.9560               | 0.9667               |
| Rye                 | Mt CO <sub>2</sub> eq/yr | 0.02                        | 0.03 | 0.00                       | 0.00    | 0.9560               | 0.9667               |
| Sheep and goat meat | Mt CO <sub>2</sub> eq/yr | 0.02                        | 0.02 | 0.00                       | 0.00    | 0.1080               | 0.9170               |
| Wheat               | Mt CO <sub>2</sub> eq/yr | 0.99                        | 0.53 | -0.01                      | 0.00    | 0.2075               | 0.3617               |

**Table S8.** Results of GLOBIOM models for net trade of the crop/livestock products. Average values for the years 2020 and 2050 are presented for mutual comparison, and results of linear models of development of values from 2000 to 2050 are chosen as the minimum and maximum values from all GLOBIOM models for regression coefficient (a) and coefficient of determination (R<sup>2</sup>).

| Net Trade           | Unit   | Values for individual years |         | Regression characteristics |         |                      |                      |
|---------------------|--------|-----------------------------|---------|----------------------------|---------|----------------------|----------------------|
|                     |        | 2020                        | 2050    | a (min)                    | a (max) | R <sup>2</sup> (min) | R <sup>2</sup> (max) |
| Milk (all)          | 1000 t | -275.72                     | -991.49 | -28.10                     | -21.36  | 0.9303               | 0.9882               |
| Barley              | 1000 t | 704.93                      | 82.78   | -11.35                     | 1.17    | 0.0138               | 0.6179               |
| Bovine meat         | 1000 t | -18.16                      | -37.73  | -1.27                      | -0.95   | 0.8384               | 0.9622               |
| Corn                | 1000 t | -312.05                     | -458.21 | -6.84                      | -5.23   | 0.6335               | 0.8579               |
| Oats                | 1000 t | 146.97                      | 251.58  | 4.82                       | 5.12    | 0.9529               | 0.9708               |
| Pig meat            | 1000 t | -198.21                     | -335.39 | -7.16                      | -6.96   | 0.9290               | 0.9501               |
| Poultry eggs        | 1000 t | 32.28                       | 21.63   | 0.38                       | 0.41    | 0.3464               | 0.4568               |
| Poultry meat        | 1000 t | -95.60                      | -158.51 | -2.71                      | -2.66   | 0.9382               | 0.9504               |
| Rapeseed oil        | 1000 t | 95.79                       | -360.76 | -8.83                      | -8.59   | 0.7509               | 0.7748               |
| Rye                 | 1000 t | -34.37                      | 93.36   | 4.70                       | 4.73    | 0.9825               | 0.9851               |
| Sheep and goat meat | 1000 t | -0.44                       | -0.25   | -0.01                      | 0.00    | 0.0005               | 0.5732               |
| Wheat               | 1000 t | 2132.96                     | 476.39  | -2.34                      | 14.58   | 0.0001               | 0.1244               |

**Table S9.** Results of GLOBIOM models for calories and calories target of the crop/livestock products. Average values for the years 2020 and 2050 are presented for mutual comparison, and results of linear models of development of values from 2000 to 2050 are chosen as the minimum and maximum values from all GLOBIOM models for regression coefficient (a) and coefficient of determination (R<sup>2</sup>).

|                        |            | Values for individual years |        | Regression characteristics |         |                      |                      |
|------------------------|------------|-----------------------------|--------|----------------------------|---------|----------------------|----------------------|
| <b>Calories</b>        | Unit       | 2020                        | 2050   | a (min)                    | a (max) | R <sup>2</sup> (min) | R <sup>2</sup> (max) |
| Milk (all)             | kcal/cap/d | 341.23                      | 338.31 | -0.37                      | -0.29   | 0.6146               | 0.8239               |
| Barley                 | kcal/cap/d | 306.89                      | 297.82 | 1.74                       | 1.86    | 0.5990               | 0.6871               |
| Bovine meat            | kcal/cap/d | 25.73                       | 27.66  | 0.05                       | 0.06    | 0.3671               | 0.5202               |
| Oats                   | kcal/cap/d | 1.84                        | 1.71   | 0.00                       | 0.00    | 0.0167               | 0.0532               |
| Pig meat               | kcal/cap/d | 221.33                      | 204.83 | -0.04                      | 0.03    | 0.0001               | 0.0071               |
| Poultry eggs           | kcal/cap/d | 33.32                       | 27.53  | -0.65                      | -0.64   | 0.8200               | 0.8408               |
| Poultry meat           | kcal/cap/d | 89.32                       | 87.33  | -0.02                      | 0.00    | 0.0002               | 0.0123               |
| Rapeseed oil           | kcal/cap/d | 278.57                      | 353.71 | 2.45                       | 2.68    | 0.7628               | 0.7972               |
| Rye                    | kcal/cap/d | 69.45                       | 63.42  | -0.45                      | -0.44   | 0.6872337            | 0.7256997            |
| Sheep and goat meat    | kcal/cap/d | 1.58                        | 1.40   | -0.01                      | 0.00    | 0.0806               | 0.7234               |
| Wheat                  | kcal/cap/d | 511.5                       | 508.6  | -3.97                      | -3.85   | 0.6953               | 0.7107               |
| <b>Calories Target</b> |            |                             |        |                            |         |                      |                      |
| Milk (all)             | kcal/cap/d | 323.65                      | 323.65 | -0.47                      |         | 0.4286               |                      |
| Barley                 | kcal/cap/d | 295.18                      | 295.19 | 1.73                       |         | 0.7087               |                      |
| Bovine meat            | kcal/cap/d | 23.78                       | 26.42  | 0.05                       |         | 0.1824               |                      |
| Oats                   | kcal/cap/d | 1.80                        | 1.69   | 0.00                       |         | 0.0020               |                      |
| Pig meat               | kcal/cap/d | 181.09                      | 181.09 | -0.44                      |         | 0.6689               |                      |
| Poultry eggs           | kcal/cap/d | 28.56                       | 25.54  | -0.67                      |         | 0.7746               |                      |
| Poultry meat           | kcal/cap/d | 83.91                       | 83.91  | -0.06                      |         | 0.1097               |                      |
| Rapeseed oil           | kcal/cap/d | 325.53                      | 419.37 | 3.69                       |         | 0.8928               |                      |
| Rye                    | kcal/cap/d | 66.60                       | 62.43  | -0.45                      |         | 0.6628               |                      |
| Sheep and goat meat    | kcal/cap/d | 1.33                        | 1.18   | -0.01                      |         | 0.9139               |                      |
| Wheat                  | kcal/cap/d | 501.99                      | 502.01 | -4.10                      |         | 0.7086               |                      |
